# Supplementary material for: Meta-analysis for milk fat and protein percentage using imputed sequence variant genotypes in 94,321 cattle from eight cattle breeds
Source: Genet Sel Evol. 2020 Jul 7;52:37. doi: 10.1186/s12711-020-00556-4 (PMC7339598; doi:10.1186/s12711-020-00556-4)
Supplement: Supplementary file 3 — Additional file 3: Table S2. QTL detected for protein percentage in the meta-analysis. chr = chromosome, pos = position in base pair on UMD3.1 assembly, ARS-UCD2.1 = position in base pair on ASR-UCD2.1 assembly, p = p-value in the meta-analysis, dir = direction of effect in each of the GWAS (from left to right: Braunvieh, Fleckvieh, German Holstein, Norwegian Red, Australian bull dataset, Australian cow dataset, Montbéliarde, Normande, French Holstein), start = pos – 250 Kb, end = pos + 250 Kb, nSig = number of variants with a p-value ≤ 10−8 in the interval, nGenic = nSig associated with a gene, genes = genes in the interval with significant variants, cojo = p-value in COJO analysis for retained variants, or discarded/not present to indicate variants that were discarded or not included in COJO analysis), sameDirVal = indicates whether a variant had the same direction of Z-score in the meta-analysis and the validation analysis (- = not included in validation analysis, 0 = opposite direction, 1 = same direction), pVal = p-value in the validation analysis. [file 12711_2020_556_MOESM3_ESM.xlsx]

## Sheet: QTL prot%
trait	chr	pos	p	ARS-UCD2.1	dir	start	end	nVariants	nGenic	genes	cojo	sameDirVal	pVal
prot%	1	1411199	6.708e-10	chr1:2133387	------+--	1161199	1661199	2	0	-	6.7e-10	1	0.001054
prot%	1	144437682	2.772e-17	chr1:142874361	+++++++++	144187682	144687682	90	32	SLC37A1	2.5e-18	1	0.0002459
prot%	1	154115349	2.851e-15	chr1:152378285	-++++++++	153865349	154365349	46	22	SH3BP5;UBL5	2.5e-16	1	0.0008353
prot%	2	120243801	1.868e-11	chr2:119436960	-???++???	119993801	120493801	1	0	-	discarded	1	0.00765
prot%	2	122850881	5.135e-10	chr2:122265642	????++?+?	122600881	123100881	11	10	ZCCHC17;NKAIN1	discarded	1	0.005751
prot%	2	124796754	1.834e-11	chr2:124214131	????++???	124546754	125046754	8	1	MECR	1.9e-11	1	0.004227
prot%	3	7924949	9.439e-14	chr3:10141230	+++++++++	7674949	8174949	40	22	FCRLB;FCRLA;FCGR2B	1.1e-24	1	0.005167
prot%	3	10258823	1.073e-09	chr3:103111930	????++???	10008823	10508823	2	0	-	6e-10	1	0.001345
prot%	3	11492928	1.017e-09	chr3:11375713	+--------	11242928	11742928	1	0	-	discarded	1	0.001873
prot%	3	12801777	5.858e-19	chr3:12761484	?++?++??+	12551777	13051777	29	1	FCRL3	discarded	1	2.315e-05
prot%	3	13969958	3.231e-34	chr3:13922374	?++?++??+	13719958	14219958	99	72	ETV3L;LOC511220;LRRC71;PEAR1;NTRK1;INSRR;SH2D2A;HDGF;MRPL24;RRNAD1;ISG20L2;CRABP2;NES	6.5e-35	1	0.0004082
prot%	3	15527789	1.89e-106	chr3:15472860	++++++--+	15277789	15777789	393	302	FDPS;PKLR;HCN3;CLK2;SCAMP3;FAM189B;GBA;MTX1;THBS3;MUC1;MIR92B;TRIM46;KRTCAP2;DPM3;SLC50A1;EFNA1;EFNA3;EFNA4;ADAM15;DCST1;DCST2;ZBTB7B;FLAD1;SHC1;PBXIP1;PMVK;KCNN3	2.5e-95	1	2.983e-12
prot%	3	17240479	5.655e-22	chr3:17178874	??+?++??+	16990479	17490479	332	7	LOC786371;PGLYRP3;LELP1	1.3e-15	1	1.857e-14
prot%	3	18686002	1.647e-15	chr3:18643505	-+++++-?+	18436002	18936002	57	4	TCHHL1;S100A10	2.6e-12	1	5.066e-09
prot%	3	20709413	3.472e-19	chr3:20663561	??+?++?++	20459413	20959413	62	42	ANP32E;PLEKHO1;VPS45;OTUD7B;BOLA1;HIST2H2BE;H2B;LOC530773;FCGR1A	discarded	1	2.049e-10
prot%	3	22189645	9.232e-18	chr3:22084807	??+?++?++	21939645	22439645	13	0	-	discarded	1	6.11e-07
prot%	3	23437263	2.909e-12	chr3:23327545	-?+?++-??	23187263	23687263	8	6	NOTCH2;LOC789317	discarded	1	1.502e-07
prot%	3	32313520	8.768e-10	chr3:32200883	++++++--+	32063520	32563520	9	7	DENND2D;CEPT1	discarded	1	0.1406
prot%	3	34387618	1.894e-39	chr3:34274095	+++++++++	34137618	34637618	425	317	CELSR2;SARS;KIAA1324;C3H1orf194;TMEM167B;TAF13;WDR47;CLCC1;GPSM2	1.4e-23	1	3.505e-05
prot%	3	80933868	4.062e-09	chr3:7928045	-------+-	80683868	81183868	5	0	-	discarded	1	0.02852
prot%	3	103706329	9.741e-09	chr3:80603002	+++++++++	103456329	103956329	1	0	-	6e-10	1	0.3136
prot%	4	77828599	1.282e-14	chr4:77147308	++????++?	77578599	78078599	11	10	GCK;MYL7;POLD2;AEBP1;POLM	not present	1	5.002e-07
prot%	4	98856852	1.226e-09	chr4:97955600	+++++++++	98606852	99106852	13	13	SLC35B4	1.2e-09	1	0.02551
prot%	5	23623311	2.067e-12	chr5:23467004	+++++++++	23373311	23873311	176	3	CRADD	1.7e-22	1	0.00196
prot%	5	28276427	7.007e-12	chr5:28119510	??+++++-+	28026427	28526427	42	35	SCN8A	discarded	1	0.09396
prot%	5	30177273	1.361e-11	chr5:30005851	+++++++++	29927273	30427273	16	13	FAIM2;FMNL3;FAM186B	discarded	1	0.01239
prot%	5	31349638	3.59e-36	chr5:31185948	+?++++?-+	31099638	31599638	77	14	CACNB3;CCNT1;KANSL2;LALBA	6.3e-16	1	3.428e-08
prot%	5	32526559	1.521e-22	chr5:32358486	??+?+++?+	32276559	32776559	194	122	ASB8;PFKM;SENP1;COL2A1;TMEM106C;LOC101905514;VDR;HDAC7;RAPGEF3;ENDOU;RPAP3	discarded	1	4.541e-07
prot%	5	34140494	1.608e-09	deleted	++++++--+	33890494	34390494	4	1	SLC38A1	4.2e-20	1	0.1305
prot%	5	35208425	6.548e-11	chr5:35026919	??+++++++	34958425	35458425	34	3	ANO6	discarded	1	0.03571
prot%	5	75669857	1.506e-35	chr5:75294488	++++++-++	75419857	75919857	1162	363	NCF4;CSF2RB;LOC783544;TST;MPST;KCTD17	2e-35	1	1.278e-05
prot%	5	77772729	2.34e-11	chr5:77402476	--+?+++++	77522729	78022729	18	4	FGD4	discarded	1	0.005156
prot%	5	91126728	1.029e-09	chr5:90696457	-++-+++-+	90876728	91376728	2	2	PLEKHA5	discarded	1	0.001379
prot%	5	92407250	1.596e-15	chr5:91973177	+++?+++-+	92157250	92657250	42	1	RERGL	discarded	1	6.762e-08
prot%	5	93945991	2.76e-53	chr5:93516319	++++++++-	93695991	94195991	502	263	LMO3;MGST1;SLC15A5	3e-44	1	1.053e-10
prot%	5	112074139	1.96e-09	chr5:111559114	????++???	111824139	112324139	1	1	TNRC6B	discarded	1	0.001213
prot%	5	115548056	8.591e-09	chr5:114842999	????++???	115298056	115798056	1	1	PARVB	discarded	1	0.03794
prot%	5	116917526	7.896e-09	chr5:116189754	+++++++?+	116667526	117167526	4	1	PPARA	discarded	1	0.3836
prot%	5	118106215	1.474e-30	chr5:116993826	+++?+++++	117856215	118356215	346	331	GRAMD4;TBC1D22A;MIR2284H	1.1e-20	1	1.615e-05
prot%	5	119875455	3.579e-10	chr5:119670565	??????+??	119625455	120125455	0	0	-	not present	-	-
prot%	6	26762313	7.11e-10	chr6:25389811	????+????	26512313	27012313	2	1	ADH4	discarded	-	-
prot%	6	31457623	3.589e-17	chr6:30032450	+?+++??++	31207623	31707623	165	161	PDLIM5	discarded	1	0.09409
prot%	6	33302450	3.428e-17	chr6:31874959	??+?+????	33052450	33552450	15	0	-	discarded	-	-
prot%	6	34687659	1.112e-16	chr6:33251451	??+?+????	34437659	34937659	8	0	-	discarded	-	-
prot%	6	36673589	1.791e-11	chr6:35233637	???+?????	36423589	36923589	2	0	-	not present	-	-
prot%	6	38031954	3.42e-106	chr6:36604584	??++++?++	37781954	38281954	16	10	HERC6;ABCG2;PKD2	3.7e-108	1	1.183e-10
prot%	6	39903405	1.665e-16	chr6:38462312	??+??????	39653405	40153405	11	0	-	not present	-	-
prot%	6	40942681	2.729e-12	chr6:39490919	??+??????	40692681	41192681	11	0	-	not present	-	-
prot%	6	42208854	2.599e-18	chr6:40750291	??++++??+	41958854	42458854	69	69	KCNIP4	discarded	1	0.0006336
prot%	6	43253195	5.513e-10	chr6:41806547	??+??????	43003195	43503195	12	0	-	not present	-	-
prot%	6	44558485	4.033e-19	chr6:43090955	??+?++-++	44308485	44808485	41	0	-	discarded	1	0.3349
prot%	6	45730947	3.821e-10	chr6:44234572	??-??????	45480947	45980947	1	0	-	not present	-	-
prot%	6	74167320	4.045e-09	chr6:72502298	-?----+--	73917320	74417320	1	0	-	discarded	1	0.0444
prot%	6	78871308	7.996e-09	chr6:77211274	??+?++-++	78621308	79121308	2	0	-	1.1e-13	1	0.008385
prot%	6	79929712	1.86e-13	chr6:78260303	?++?+++-+	79679712	80179712	26	0	-	discarded	1	0.003176
prot%	6	80940718	8.668e-12	chr6:79223567	++????++?	80690718	81190718	53	0	-	not present	1	0.2632
prot%	6	82183796	5.691e-21	chr6:80460958	??+?++?-+	81933796	82433796	91	0	-	discarded	1	2.426e-06
prot%	6	83419635	1.102e-23	chr6:81697902	-++++++++	83169635	83669635	140	0	-	1.1e-12	1	3.294e-09
prot%	6	84699730	1.329e-36	chr6:82978543	+?++++?-+	84449730	84949730	251	6	CENPC1	discarded	1	1.138e-06
prot%	6	85961307	3.585e-41	chr6:84223380	-++++++++	85711307	86211307	277	152	YTHDC1;LOC100138004;UGT2B4;LOC100140261;UGT2B10	discarded	1	2.225e-12
prot%	6	87202257	9.87e-105	chr6:85469856	+++++++++	86952257	87452257	1769	908	SULT1D1;SULT1E1;CSN1S1;CSN2;HSTN;STATH;CSN1S2;ODAM;CSN3	7.4e-88	1	1.163e-29
prot%	6	88505667	7.924e-40	chr6:86773674	+++?+++++	88255667	88755667	487	204	SLC4A4;GC	2.6e-17	1	1.031e-17
prot%	6	89595335	7.569e-16	chr6:87841611	?++?++-++	89345335	89845335	119	21	ADAMTS3	discarded	1	0.0002798
prot%	6	90812882	3.485e-12	chr6:89063150	?++++++++	90562882	91062882	33	6	CXCL3;MTHFD2L	discarded	1	0.0007142
prot%	7	13805838	4.203e-11	chr7:12691981	-++++++++	13555838	14055838	93	78	RAD23A;CALR;FARSA;SYCE2;GCDH;KLF1;DNASE2;MAST1;RNASEH2A;HOOK2	7.8e-12	1	0.3363
prot%	7	56385881	2.5e-09	chr7:54500491	+++++++-+	56135881	56635881	5	0	-	4.6e-10	1	0.2978
prot%	8	39610988	2.395e-09	chr8:39359627	+++++++-+	39360988	39860988	4	3	INSL6	2.4e-09	1	0.2434
prot%	8	112120105	3.483e-09	chr8:110219319	???????+?	111870105	112370105	1	1	PSMD5	not present	-	-
prot%	9	26553008	8.679e-17	chr9:26228115	+++++++++	26303008	26803008	268	0	-	1.3e-18	1	1.477e-05
prot%	9	87587493	5.279e-10	chr9:86440632	++++++???	87337493	87837493	13	0	-	9.4e-10	1	0.004828
prot%	9	96627231	4.267e-11	chr9:95185261	++++++-++	96377231	96877231	6	6	EZR	4.7e-10	1	0.007318
prot%	10	44624977	5.977e-15	chr10:44573708	-?+?++??+	44374977	44874977	7	5	FRMD6;GNG2	discarded	1	0.04008
prot%	10	46553243	5.41e-55	chr10:46495051	+++++++++	46303243	46803243	682	484	HERC1;FBXL22;USP3;CA12	6.5e-55	1	9.789e-08
prot%	10	62446075	7.257e-11	chr10:62221106	+++++++++	62196075	62696075	3	3	MYEF2;SLC24A5	6.4e-11	1	0.0001498
prot%	11	21051217	1.176e-10	chr11:100626987	++++++?++	20801217	21301217	47	34	HNRPLL;GALM	1.7e-12	1	2.726e-05
prot%	11	60840062	9.171e-09	chr11:104173054	??+?+++-+	60590062	61090062	1	0	-	discarded	1	0.03283
prot%	11	62282197	1.288e-15	chr11:21032107	--++++--+	62032197	62532197	35	8	UGP2;VPS54	2.6e-12	1	0.1334
prot%	11	63430172	1.032e-16	chr11:60909059	+++++++++	63180172	63680172	55	39	TMSB4X;CEP68;RAB1A	8.1e-13	1	0.0001216
prot%	11	100649293	1.82e-09	chr11:62327924	++++++-?+	100399293	100899293	5	0	-	discarded	1	0.2669
prot%	11	104229609	5.816e-31	chr11:63472240	+++++++++	103979609	104479609	311	194	ABO	6.8e-32	1	0.0004932
prot%	12	69575658	8.755e-10	chr12:69037181	????++???	69325658	69825658	4	2	DCT;LOC781339	4.5e-10	1	4.108e-06
prot%	12	72286852	6.341e-17	chr12:71643649	++??+++++	72036852	72536852	54	0	-	2.2e-17	1	4.44e-06
prot%	12	77579067	1.611e-12	chr12:73716433	+++?+++++	77329067	77829067	33	0	-	1e-12	1	2.34e-05
prot%	13	46723749	2.491e-13	chr13:46366318	+++++++++	46473749	46973749	59	18	ADARB2;WDR37;IDI1;GTPBP4	2.5e-13	1	0.0001019
prot%	14	1722033	6.64e-862	chr14:9719871	?++?+++++	1472033	1972033	841	732	C14H8orf33;ZNF34;RPL8;ZNF7;COMMD5;ARHGAP39;MIR2308;C14H8orf82;LRRC24;LRRC14;RECQL4;MFSD3;GPT;PPP1R16A;FOXH1;KIFC2;CYHR1;TONSL;SLC39A4;CPSF1;ADCK5;GPR172A;FBXL6;TMEM249;SCRT1;DGAT1;HSF1;BOP1;LOC615157;MROH1;LOC523023;FAM203A;MAF1;SHARPIN;CYC1;GPAA1;EXOSC4;OPLAH;SMPD5;SPATC1	0	1	1.57e-210
prot%	14	2833399	2.09e-249	chr14:12321441	?++?+++++	2583399	3083399	978	390	LY6E;CYP11B1;GML;LOC100848249;LY6D;LYNX1;LYPD2;SLURP1;THEM6;PSCA;ARC;BAI1;TSNARE1	3.9e-08	1	4.833e-46
prot%	14	4354167	6.379e-55	chr14:536219	+++-+++-+	4104167	4604167	772	747	EIF2C2;CHRAC1;TRAPPC9	1.2e-28	1	1.036e-16
prot%	14	5823262	2.567e-20	chr14:1688550	+++++++?+	5573262	6073262	133	48	FAM135B	discarded	1	0.009865
prot%	14	7043648	1.973e-14	chr14:3325343	?++?+++++	6793648	7293648	18	0	-	1.2e-17	1	3.778e-05
prot%	14	9580394	9.928e-09	chr14:48507847	---------	9330394	9830394	2	2	PHF20L1	discarded	1	0.02679
prot%	14	10786903	1.921e-09	chr14:4798255	---?---?-	10536903	11036903	1	0	-	discarded	1	0.02603
prot%	14	13437566	5.01e-10	chr14:61824641	-+??++???	13187566	13687566	1	0	-	3.1e-15	1	0.03729
prot%	14	50669016	7.779e-12	chr14:63173429	++++++-++	50419016	50919016	62	0	-	1e-08	1	0.007405
prot%	14	64005414	1.189e-47	chr14:64440908	??+?++??+	63755414	64255414	68	5	KLF10;UBR5	discarded	1	2.706e-19
prot%	14	65360723	7.746e-63	chr14:66075953	??+?++??+	65110723	65610723	162	14	ZNF706;YWHAZ	discarded	1	3.063e-25
prot%	14	66636012	2.2e-89	chr14:67628996	??+?++???	66386012	66886012	43	17	FBXO43;RGS22;MGC148714	9.4e-32	1	1.617e-30
prot%	14	68367316	8.618e-67	chr14:6009387	??+?++??+	68117316	68617316	24	16	NIPAL2;POP1;MATN2	2.8e-21	1	3.328e-26
prot%	14	69971605	4.689e-47	chr14:68871040	??+?++??+	69721605	70221605	145	134	CPQ;SDC2	discarded	1	9.492e-17
prot%	14	71214638	2.839e-26	chr14:69944734	??++++??+	70964638	71464638	53	1	C14H8orf37	discarded	1	2.09e-10
prot%	14	72263601	3.935e-29	chr14:71926335	+?+?++??+	72013601	72513601	31	16	KIAA1429;RAD54B;GEM	2.6e-12	1	8.267e-13
prot%	14	74251117	2.834e-12	chr14:8524891	??+?++??+	74001117	74501117	8	0	-	discarded	1	2.119e-06
prot%	15	27174146	2.237e-11	chr15:26746514	??++++?-+	26924146	27424146	14	0	-	discarded	1	0.06248
prot%	15	28357864	1.339e-26	chr15:27929245	?+++++?++	28107864	28607864	84	65	PAFAH1B2;TAGLN;PCSK7;RNF214;BACE1;CEP164;DSCAML1	8.1e-27	1	0.01169
prot%	15	31124471	3.889e-11	chr15:30596311	??+?++??+	30874471	31374471	13	0	-	discarded	1	0.009444
prot%	15	48970575	9.816e-09	chr15:48309691	??+?++??+	48720575	49220575	1	0	-	discarded	1	0.001991
prot%	15	50560539	6.347e-09	chr15:49795165	+-+++++-+	50310539	50810539	13	12	LOC528515;LOC524658	discarded	1	0.01827
prot%	15	52210366	2.871e-14	chr15:51373761	?+++++--+	51960366	52460366	72	70	STIM1;RHOG;PGAP2;NUP98;ART1;RNF121	discarded	1	2.956e-06
prot%	15	53980638	3.077e-40	chr15:53194224	-++++++?+	53730638	54230638	434	356	PLEKHB1;RAB6A;MRPL48;PAAF1;DNAJB13;UCP2;UCP3;C2CD3	6.7e-45	1	3.666e-08
prot%	15	55280409	1.556e-10	chr15:54503670	??+++++-+	55030409	55530409	3	2	ARRB1	discarded	1	7.28e-05
prot%	15	65931308	4.28e-09	chr15:65125067	+++++++++	65681308	66181308	7	0	-	2.6e-11	1	0.1141
prot%	16	161447	8.339e-14	chr16:332645	???+?????	0	411447	18	0	-	not present	-	-
prot%	16	1607307	3.27e-113	chr16:1790257	+++++++++	1357307	1857307	825	147	ZBED6;SOX13;ETNK2;REN;KISS1;GOLT1A;PLEKHA6	4.5e-140	1	6.688e-12
prot%	16	2821599	3.223e-13	chr16:2991203	?+?+?????	2571599	3071599	11	7	NFASC;CNTN2;DSTYK;TMCC2;KLHDC8A	not present	-	-
prot%	16	4289641	1.468e-10	chr16:4438528	?+???????	4039641	4539641	3	3	SRGAP2;DYRK3;MAPKAPK2	not present	-	-
prot%	16	6577841	4.956e-09	chr16:6739984	?+???????	6327841	6827841	4	4	KCNT2	not present	-	-
prot%	16	39765406	6.326e-13	chr16:38908045	????---??	39515406	40015406	3	1	VAMP4	discarded	1	0.0005364
prot%	16	40802346	1.41e-16	chr16:39936892	????+++++	40552346	41052346	53	13	PIGC;SUCO	4.9e-40	1	0.1077
prot%	16	42242553	3.537e-12	chr16:41367564	????++???	41992553	42492553	5	2	DHRS3	discarded	1	0.0001373
prot%	16	60794757	2.566e-12	chr16:59366254	+++++++++	60544757	61044757	101	58	SEC16B;LOC100299281	6.3e-21	1	3.243e-05
prot%	16	67705193	5.079e-14	chr16:66218658	++++++--+	67455193	67955193	140	140	SWT1;IVNS1ABP	7.7e-17	1	0.2745
prot%	17	18075211	4.474e-09	chr17:17769067	+++?+++++	17825211	18325211	1	0	-	4.5e-09	1	0.03356
prot%	18	2187155	2.929e-13	chr18:2155505	+++++++-+	1937155	2437155	59	59	FA2H	3.1e-11	1	0.0172
prot%	18	36882967	6.826e-28	chr18:36756349	+++++++?+	36632967	37132967	133	72	NFAT5;NQO1;NOB1;WWP2	9e-34	1	0.0008982
prot%	18	55502444	3.349e-09	chr18:55057383	---------	55252444	55752444	2	2	TMEM143	3.3e-09	1	0.01992
prot%	18	58407574	5.322e-09	chr18:58069529	-+++++-++	58157574	58657574	6	0	-	2.2e-08	1	0.01448
prot%	18	59632653	1.848e-09	chr18:59332593	-++?+++-+	59382653	59882653	7	0	-	discarded	1	0.3237
prot%	19	8642656	3.6e-11	chr19:27807210	+++++++++	8392656	8892656	96	0	-	1.8e-08	1	0.03757
prot%	19	28418737	8.059e-13	chr19:32907599	?+++++?++	28168737	28668737	55	27	TRAPPC1;KCNAB3;ALOXE3;HES7;PER1;VAMP2	1.5e-14	1	0.007656
prot%	19	33508946	1.529e-16	chr19:34652931	+++++++++	33258946	33758946	124	45	TEKT3;CDRT4;TVP23B;ZNF286A	2.7e-23	1	0.1657
prot%	19	35254430	8.899e-10	chr19:42186065	++++++-++	35004430	35504430	4	4	TOM1L2;RAI1	5.2e-17	1	0.6071
prot%	19	42826808	6.049e-28	chr19:48286351	-++++++++	42576808	43076808	1407	965	JUP;LEPREL4;FKBP10;NT5C3L;KLHL10;KLHL11;ACLY;TTC25;CNP;NKIRAS2;DHX58;KAT2A;HSPB9;RAB5C;KCNH4;HCRT;GHDC;STAT5B;STAT5A;STAT3	1.4e-32	1	3.58e-08
prot%	19	48937420	4.102e-11	chr19:50784393	---?--+?-	48687420	49187420	1	1	ERN1	7e-10	1	0.1536
prot%	19	51393068	3.707e-15	chr19:56487488	+++++++++	51143068	51643068	66	40	FASN;DUS1L;GPS1;RFNG	7.4e-09	1	0.03151
prot%	19	57108832	9.904e-09	chr19:60419046	------+--	56858832	57358832	1	1	LOC101910177	2.5e-12	1	0.02529
prot%	19	60994870	5.977e-09	chr19:8412279	++?+++???	60744870	61244870	6	0	-	5.9e-13	1	0.009727
prot%	20	25142268	5.4e-09	chr20:25117015	????++???	24892268	25392268	1	0	-	discarded	1	0.08983
prot%	20	26189869	5.347e-09	chr20:26180920	++-------	25939869	26439869	1	1	ITGA1	discarded	1	0.5374
prot%	20	27403119	5.352e-11	chr20:27390504	+?++++??+	27153119	27653119	9	0	-	discarded	1	0.0002419
prot%	20	28998026	5.905e-21	chr20:28988101	+++?++??+	28748026	29248026	713	161	HCN1	discarded	1	6.947e-05
prot%	20	30106314	9.092e-67	chr20:30094520	????++???	29856314	30356314	457	11	MRPS30	1.6e-25	1	5.366e-20
prot%	20	31909478	1.02e-240	chr20:31888449	+++?++--+	31659478	32159478	1533	781	CCDC152;GHR	3.2e-153	1	8.336e-44
prot%	20	33097573	4.508e-58	chr20:33084375	?+++++??+	32847573	33347573	736	439	OXCT1;PLCXD3;C6	1.3e-13	1	4.92e-14
prot%	20	34362580	5.92e-37	chr20:34349423	????++???	34112580	34612580	994	0	-	discarded	1	1.708e-12
prot%	20	35539225	2.263e-31	chr20:35523457	?+++++??+	35289225	35789225	85	63	FYB;RICTOR;OSMR	discarded	1	1.199e-11
prot%	20	37139054	1.855e-20	chr20:37114924	????++???	36889054	37389054	61	52	WDR70;NUP155;C20H5orf42;NIPBL	discarded	1	1.514e-06
prot%	20	39315399	2.76e-15	chr20:39276937	+++++++++	39065399	39565399	18	10	AGXT2;RAD1;TTC23L;RAI14	discarded	1	0.01832
prot%	20	41167092	8.977e-09	chr20:41112877	---------	40917092	41417092	1	0	-	2e-15	1	0.01739
prot%	20	56722274	2.176e-15	chr20:56646689	??++++?-+	56472274	56972274	172	80	FAM134B	3.6e-24	1	0.03166
prot%	20	70248004	1.651e-09	chr20:70099061	+++++++++	69998004	70498004	13	0	-	discarded	1	0.002639
prot%	21	8956206	2.971e-16	chr21:8766136	+++++++++	8706206	9206206	121	6	ARRDC4	3.1e-16	1	1.136e-05
prot%	22	53518279	7.522e-09	chr22:52949606	+++++++++	53268279	53768279	1	1	LTF	7.6e-09	1	0.7648
prot%	23	16084806	6.096e-10	chr23:16076270	??+?++???	15834806	16334806	1	0	-	discarded	1	0.001643
prot%	23	45044010	2.419e-12	chr23:45186292	+++++++++	44794010	45294010	18	12	SMIM13	discarded	1	0.05575
prot%	23	47921252	4.984e-10	chr23:48071983	+++?++-++	47671252	48171252	5	4	RREB1	discarded	1	0.006612
prot%	23	49301340	2.906e-10	chr23:49435915	??+?++??+	49051340	49551340	8	8	FARS2;LYRM4;CDYL	discarded	1	0.1034
prot%	23	51106202	2.352e-28	chr23:51252204	+++++++++	50856202	51356202	198	53	GMDS	2.9e-28	1	2.886e-06
prot%	23	52162002	4.485e-11	chr23:52315964	??+?++??+	51912002	52412002	5	3	EXOC2	discarded	1	0.1896
prot%	24	25508642	1.577e-09	chr24:25199508	+++++++++	25258642	25758642	71	21	RNF125;TRAPPC8	discarded	1	0.003297
prot%	24	58811405	2.011e-24	chr24:58306855	+++++++++	58561405	59061405	85	40	RAX;CPLX4;LMAN1	3.7e-25	1	0.0005459
prot%	24	61286008	1.087e-12	chr24:60799931	??+++++-+	61036008	61536008	81	11	KIAA1468;TNFRSF11A	1.9e-13	1	0.6207
prot%	25	26306952	2.616e-10	chr25:26048952	+++++++++	26056952	26556952	64	64	CLN3	1.3e-10	1	0.2518
prot%	25	28036925	3.558e-09	chr25:27780643	?+???????	27786925	28286925	3	2	PSPH;SUMF2	not present	-	-
prot%	25	36527270	3.696e-25	chr25:35991039	???+?????	36277270	36777270	18	13	EPO;GIGYF1;GNB2;LOC532330;TSC22D4;C25H7orf61	not present	-	-
prot%	25	38454664	3.222e-09	chr25:37908732	+++?+++++	38204664	38704664	4	0	-	1.6e-09	1	0.04711
prot%	26	21010356	5.965e-10	chr26:21141278	-++++++++	20760356	21260356	8	8	CHUK;CWF19L1	discarded	1	0.02665
prot%	26	22740532	1.242e-20	chr26:22868295	++++++-+-	22490532	22990532	278	213	C26H10orf76;HPS6;LDB1;PPRC1;NOLC1;ELOVL3;PITX3;GBF1;NFKB2;MIR146B;TMEM180;ACTR1A	1.3e-20	1	0.0001458
prot%	26	23868825	2.448e-11	chr26:23624791	?+++++-++	23618825	24118825	42	42	CNNM2;NT5C2	discarded	1	0.002736
prot%	27	41268170	4.185e-09	chr27:41395101	+++?+++-+	41018170	41518170	6	0	-	4.2e-09	1	0.003097
prot%	28	34332501	5.455e-09	chr28:34135221	?+???????	34082501	34582501	2	0	-	not present	-	-
prot%	28	35832023	2.14e-18	chr28:35628007	+++++++-+	35582023	36082023	418	317	CGN1;CL46;CL43;SFTPD;MBL1;MAT1A;DYDC1;DYDC2	2.2e-18	1	0.0177
prot%	28	37044262	5.403e-12	chr28:36840005	???+?????	36794262	37294262	15	0	-	not present	-	-
prot%	29	9576277	6.469e-51	chr29:39987200	+++++++++	9326277	9826277	228	38	PICALM;CCDC83	4.3e-56	1	3.182e-12
prot%	29	40682373	1.076e-14	chr29:41308337	+++?++??+	40432373	40932373	19	9	DDB1;DAK;SDHAF2;SYT7	discarded	1	1.096e-05
prot%	29	42005507	1.831e-58	chr29:43224766	??+?++?-+	41755507	42255507	157	101	ZBTB3;TAF6L;NXF1;STX5;WDR74;SLC3A2;CHRM1;LOC519202;SLC22A6;SLC22A8;LOC532368;SLC22A24;LOC520237	5.1e-42	1	1.152e-10
prot%	29	43842901	6.405e-31	chr29:44277561	?++?++??+	43592901	44092901	236	176	RASGRP2;PYGM;SF1;MAP4K2;MIR194-2;ATG2A;PPP2R5B;GPHA2;C29H11orf85;BATF2;ARL2;SNX15;SAC3D1;NAALADL1;CDCA5;TM7SF2;ZNHIT2;MRPL49;SYVN1;CAPN1	1.6e-12	1	0.0001971
prot%	29	44923464	3.977e-14	chr29:9515475	?-+?++?++	44673464	45173464	110	72	FOSL1;C29H11orf68;DRAP1;TSGA10IP;SART1;EIF1AD;CST6;CATSPER1;GAL3ST3;SF3B2;PACS1;KLC2;RAB1B;YIF1A;TMEM151A;CD248;RIN1;BRMS1;B3GNT1;SLC29A2	discarded	1	4.106e-05

## Sheet: gene positions
gene	chr	start	end
SLC37A1	1	144364346	144437225
SH3BP5	1	154024457	154103515
UBL5	1	154150028	154150249
ZCCHC17	2	122784558	122889605
NKAIN1	2	122975078	122980139
MECR	2	124913878	124949961
FCRLB	3	7881817	7886772
FCRLA	3	7898510	7904866
FCGR2B	3	7928113	7944607
FCRL3	3	12684810	12717577
ETV3L	3	13778327	13784728
LOC511220	3	13887504	13970875
LRRC71	3	13973123	13985544
PEAR1	3	13986478	14007210
NTRK1	3	14019444	14037555
INSRR	3	14039800	14055462
SH2D2A	3	14075266	14085162
HDGF	3	14130196	14138913
MRPL24	3	14141433	14146444
RRNAD1	3	14146763	14153732
ISG20L2	3	14154160	14159242
CRABP2	3	14173130	14178630
NES	3	14208425	14215064
FDPS	3	15356047	15374937
PKLR	3	15399755	15408994
HCN3	3	15409813	15418775
CLK2	3	15422624	15431541
SCAMP3	3	15432100	15436418
FAM189B	3	15437676	15442475
GBA	3	15445102	15463930
MTX1	3	15464426	15468964
THBS3	3	15470302	15480443
MIR92B	3	15480725	15480820
MUC1	3	15482856	15486936
TRIM46	3	15488474	15498217
KRTCAP2	3	15498847	15501486
DPM3	3	15517158	15517733
SLC50A1	3	15518286	15520448
EFNA1	3	15521494	15528093
EFNA3	3	15567318	15576042
EFNA4	3	15587570	15591685
ADAM15	3	15593459	15603312
DCST1	3	15603805	15619232
DCST2	3	15619491	15636992
ZBTB7B	3	15634915	15648928
FLAD1	3	15658831	15664782
SHC1	3	15671383	15681845
PBXIP1	3	15687403	15697893
PMVK	3	15715719	15725510
KCNN3	3	15781068	15948350
LOC786371	3	17137845	17140530
PGLYRP3	3	17208990	17224318
LELP1	3	17335139	17337505
TCHHL1	3	18686495	18690937
S100A10	3	18799612	18810545
ANP32E	3	20453150	20465219
PLEKHO1	3	20519726	20528784
VPS45	3	20534021	20600696
OTUD7B	3	20656593	20712080
BOLA1	3	20759081	20760404
HIST2H2BE	3	20771300	20773622
FCGR1A	3	20847979	20856929
NOTCH2	3	23307157	23478243
LOC789317	3	23510977	23513257
DENND2D	3	32321550	32337248
CEPT1	3	32339827	32376260
CELSR2	3	34246149	34270501
SARS	3	34283445	34303242
KIAA1324	3	34313872	34353121
C3H1orf194	3	34388638	34392858
TMEM167B	3	34401025	34405907
TAF13	3	34418712	34426687
WDR47	3	34446314	34506800
CLCC1	3	34511153	34544280
GPSM2	3	34545729	34580297
GCK	4	77820949	77857151
MYL7	4	77860261	77862353
POLD2	4	77873883	77881765
AEBP1	4	77881913	77891706
POLM	4	77910509	77918593
SLC35B4	4	98840894	98876172
CRADD	5	23629705	23632125
SCN8A	5	28211640	28331404
FAIM2	5	30155763	30185025
FMNL3	5	30320681	30372554
FAM186B	5	30403708	30416321
CACNB3	5	31116984	31126056
CCNT1	5	31221136	31257293
KANSL2	5	31266940	31285052
LALBA	5	31347861	31349882
ASB8	5	32303361	32311809
PFKM	5	32312957	32337525
SENP1	5	32363553	32407690
COL2A1	5	32450298	32481276
TMEM106C	5	32486385	32491855
LOC101905514	5	32529439	32529956
VDR	5	32550521	32606144
HDAC7	5	32635940	32667499
RAPGEF3	5	32697065	32718624
ENDOU	5	32731732	32748812
RPAP3	5	32758121	32797296
SLC38A1	5	34145240	34198996
ANO6	5	35059697	35150452
NCF4	5	75641217	75659769
CSF2RB	5	75724620	75745819
LOC783544	5	75790890	75808769
TST	5	75810521	75817101
MPST	5	75818030	75827375
KCTD17	5	75855285	75866757
FGD4	5	77608406	77682214
PLEKHA5	5	91031351	91136741
RERGL	5	92432331	92442968
LMO3	5	93693961	93757644
MGST1	5	93926791	93950162
SLC15A5	5	94030765	94127585
TNRC6B	5	112043301	112172811
PARVB	5	115517820	115572329
PPARA	5	117151549	117233112
GRAMD4	5	117975282	118012354
TBC1D22A	5	118086468	118343833
MIR2284H	5	118347309	118347375
ADH4	6	26853175	26885435
PDLIM5	6	31337012	31567339
HERC6	6	37736138	37793279
ABCG2	6	37913110	38030583
PKD2	6	38040871	38099549
KCNIP4	6	41709362	43021626
CENPC1	6	84904999	84998863
YTHDC1	6	85839655	85877748
LOC100138004	6	85926576	85948595
UGT2B4	6	85963549	85989621
LOC100140261	6	86034662	86055504
UGT2B10	6	86169557	86190786
SULT1D1	6	86982496	87008610
SULT1E1	6	87035926	87094952
CSN1S1	6	87141556	87159096
CSN2	6	87179502	87188025
HSTN	6	87189736	87204439
STATH	6	87229656	87239005
CSN1S2	6	87262457	87280936
ODAM	6	87327028	87335880
CSN3	6	87378398	87392750
SLC4A4	6	88182303	88541046
GC	6	88695940	88739180
ADAMTS3	6	89162542	89460195
CXCL3	6	90811062	90813079
MTHFD2L	6	90842934	90985937
RAD23A	7	13724192	13730226
CALR	7	13731958	13735788
FARSA	7	13741743	13751839
SYCE2	7	13755274	13772236
GCDH	7	13771153	13777950
KLF1	7	13785087	13789391
DNASE2	7	13790587	13792998
MAST1	7	13793341	13818154
RNASEH2A	7	13837389	13844314
HOOK2	7	13864084	13874728
INSL6	8	39603073	39614295
PSMD5	8	112096656	112117754
EZR	9	96598249	96643275
FRMD6	10	44342323	44615289
GNG2	10	44711724	44842190
HERC1	10	46241889	46455782
FBXL22	10	46461587	46466076
USP3	10	46471349	46570989
CA12	10	46749740	46768704
MYEF2	10	62436178	62467099
SLC24A5	10	62467611	62489654
HNRPLL	11	20929508	20967132
GALM	11	21040425	21095033
UGP2	11	62244354	62299938
VPS54	11	62301309	62377281
TMSB4X	11	63290422	63395507
CEP68	11	63413128	63424655
RAB1A	11	63429725	63458565
ABO	11	104232297	104251043
DCT	12	69502941	69544658
LOC781339	12	69574459	69575727
ADARB2	13	46383731	46630127
WDR37	13	46647460	46679926
IDI1	13	46682710	46685834
GTPBP4	13	46689063	46703756
C14H8orf33	14	1487366	1489409
ZNF34	14	1491984	1502250
RPL8	14	1505030	1507633
ZNF7	14	1517535	1523303
COMMD5	14	1531491	1533526
ARHGAP39	14	1563866	1600378
MIR2308	14	1566933	1567001
C14H8orf82	14	1602474	1605012
LRRC24	14	1604105	1609477
LRRC14	14	1610263	1613725
RECQL4	14	1614027	1620509
MFSD3	14	1620570	1622643
GPT	14	1623903	1626907
PPP1R16A	14	1628814	1633988
FOXH1	14	1654701	1656256
KIFC2	14	1656950	1663804
CYHR1	14	1663923	1677519
TONSL	14	1681494	1692498
SLC39A4	14	1719732	1724220
CPSF1	14	1728207	1742670
ADCK5	14	1742714	1756301
GPR172A	14	1763994	1766621
FBXL6	14	1766767	1769754
TMEM249	14	1770660	1772329
SCRT1	14	1782901	1788087
DGAT1	14	1795351	1804562
HSF1	14	1806081	1825793
BOP1	14	1825982	1844587
LOC615157	14	1838135	1840081
MROH1	14	1844664	1894424
LOC523023	14	1901563	1903852
FAM203A	14	1905129	1907245
MAF1	14	1921784	1924818
SHARPIN	14	1925026	1929354
CYC1	14	1930186	1932580
GPAA1	14	1942672	1945910
EXOSC4	14	1947198	1949074
OPLAH	14	1957554	1966646
SMPD5	14	1966292	1968825
SPATC1	14	1970919	1998401
LY6E	14	2624758	2628462
CYP11B1	14	2705112	2710148
GML	14	2715416	2742638
LOC100848249	14	2755206	2762197
LY6D	14	2801383	2803020
LYNX1	14	2814587	2816685
LYPD2	14	2829285	2831334
SLURP1	14	2834781	2835985
THEM6	14	2839180	2842655
PSCA	14	2854604	2856167
ARC	14	2892788	2893978
BAI1	14	2948972	3014380
TSNARE1	14	3054763	3171546
EIF2C2	14	4085146	4168483
CHRAC1	14	4182522	4185763
TRAPPC9	14	4229512	4616552
FAM135B	14	5423556	5657244
PHF20L1	14	9526432	9598565
KLF10	14	63951758	63957275
UBR5	14	64169832	64308334
ZNF706	14	65337750	65348431
YWHAZ	14	65584487	65617329
FBXO43	14	66422896	66434635
RGS22	14	66472379	66593433
MGC148714	14	66637801	66647721
NIPAL2	14	68251838	68342901
POP1	14	68377530	68406373
MATN2	14	68478180	68651684
CPQ	14	69287302	69893052
SDC2	14	69930853	70050653
C14H8orf37	14	71396805	71419794
KIAA1429	14	72100497	72163615
RAD54B	14	72176935	72295285
GEM	14	72386751	72399660
PAFAH1B2	15	28260081	28286877
TAGLN	15	28318411	28323666
PCSK7	15	28323768	28351207
RNF214	15	28355288	28397142
BACE1	15	28400714	28422342
CEP164	15	28431028	28501993
DSCAML1	15	28524421	28623243
LOC528515	15	50562717	50563915
LOC524658	15	50576452	50577620
STIM1	15	51845122	52049569
RHOG	15	52061683	52075146
PGAP2	15	52075822	52089324
NUP98	15	52097535	52183246
ART1	15	52184590	52213125
RNF121	15	52330181	52413459
PLEKHB1	15	53907206	53922643
RAB6A	15	53936927	54027857
MRPL48	15	54065466	54120351
PAAF1	15	54131056	54171357
DNAJB13	15	54180361	54192907
UCP2	15	54196170	54202633
UCP3	15	54213566	54224051
C2CD3	15	54227840	54357467
ARRB1	15	55255745	55329451
ZBED6	16	1400457	1403399
SOX13	16	1716803	1728817
ETNK2	16	1734650	1749646
REN	16	1752891	1762733
KISS1	16	1774374	1777002
GOLT1A	16	1781213	1794807
PLEKHA6	16	1806692	1878608
NFASC	16	2557488	2629557
CNTN2	16	2654177	2683555
DSTYK	16	2763988	2815425
TMCC2	16	2837111	2875234
KLHDC8A	16	2930874	2936327
SRGAP2	16	4023323	4101731
DYRK3	16	4274967	4284961
MAPKAPK2	16	4319154	4365926
KCNT2	16	6371058	6664334
VAMP4	16	40005644	40029767
PIGC	16	40785953	40788409
SUCO	16	40904879	40973025
DHRS3	16	41985339	42040600
SEC16B	16	60747108	60792164
LOC100299281	16	60833854	60866398
SWT1	16	67653941	67759357
IVNS1ABP	16	67765816	67785616
FA2H	18	2183491	2237316
NFAT5	18	36847730	36898690
NQO1	18	36911358	36924689
NOB1	18	36939094	36955820
WWP2	18	36955238	37096910
TMEM143	18	55488512	55509670
KCNAB3	19	28214105	28220774
TRAPPC1	19	28221790	28223283
ALOXE3	19	28351723	28371440
HES7	19	28375017	28377490
PER1	19	28390594	28399600
VAMP2	19	28408302	28410747
TEKT3	19	33418200	33451244
CDRT4	19	33524875	33548224
TVP23B	19	33585303	33594740
ZNF286A	19	33673396	33688126
TOM1L2	19	35158487	35228878
RAI1	19	35252242	35263546
JUP	19	42602486	42626600
LEPREL4	19	42639451	42645799
FKBP10	19	42650885	42655321
NT5C3L	19	42657994	42665703
KLHL10	19	42666504	42679044
KLHL11	19	42684412	42689873
ACLY	19	42691369	42735634
TTC25	19	42749145	42771008
CNP	19	42774249	42780091
NKIRAS2	19	42812569	42816762
DHX58	19	42877797	42888179
KAT2A	19	42888854	42895399
HSPB9	19	42896709	42897222
RAB5C	19	42898002	42903081
KCNH4	19	42922699	42938502
HCRT	19	42941042	42942287
GHDC	19	42946040	42949784
STAT5B	19	42960226	42996671
STAT5A	19	43033597	43054075
STAT3	19	43056660	43132624
ERN1	19	48924511	48971838
FASN	19	51384922	51403614
DUS1L	19	51416679	51422719
GPS1	19	51422926	51427197
RFNG	19	51429344	51431873
LOC101910177	19	57097872	57105114
ITGA1	20	26116747	26227530
HCN1	20	29121455	29566631
MRPS30	20	30072215	30081516
CCDC152	20	31793082	31834092
GHR	20	31890736	32199996
OXCT1	20	32683996	32848723
PLCXD3	20	33030483	33230694
C6	20	33328558	33405555
FYB	20	35248388	35347535
RICTOR	20	35376524	35514741
OSMR	20	35521410	35588186
WDR70	20	36707140	36993695
NUP155	20	36999199	37048887
C20H5orf42	20	37092892	37174619
NIPBL	20	37189901	37303893
AGXT2	20	39156953	39199656
RAD1	20	39265413	39274082
TTC23L	20	39281008	39344413
RAI14	20	39352841	39413736
FAM134B	20	56709603	56758641
ARRDC4	21	8924763	8939028
LTF	22	53521906	53556089
LOC530773	23	30757225	30757615
H2B	23	30760352	30760837
SMIM13	23	45020474	45041768
RREB1	23	47900595	47959504
FARS2	23	48974674	49233786
LYRM4	23	49282979	49374341
CDYL	23	49451466	49608971
GMDS	23	51117008	51453402
EXOC2	23	51917537	52015377
RNF125	24	25452969	25496186
TRAPPC8	24	25595237	25652303
RAX	24	58747713	58751841
CPLX4	24	58770279	58790832
LMAN1	24	58797010	58815897
KIAA1468	24	61087762	61201878
TNFRSF11A	24	61239109	61275194
CLN3	25	26301080	26313247
PSPH	25	27955045	27977149
SUMF2	25	27995066	28005720
EPO	25	36409507	36411892
GIGYF1	25	36437200	36443896
GNB2	25	36446227	36451406
LOC532330	25	36521455	36523178
TSC22D4	25	36614550	36623767
C25H7orf61	25	36624993	36628181
CHUK	26	20966010	21008277
CWF19L1	26	21010622	21035035
C26H10orf76	26	22446522	22608433
HPS6	26	22623887	22626506
LDB1	26	22652090	22663974
PPRC1	26	22677211	22691109
NOLC1	26	22692692	22701499
ELOVL3	26	22742695	22745622
PITX3	26	22745904	22757812
GBF1	26	22761606	22884208
NFKB2	26	22891378	22898307
MIR146B	26	22930890	22930995
TMEM180	26	22945834	22960683
ACTR1A	26	22961816	22978156
CNNM2	26	23795436	23972895
NT5C2	26	23983206	24080557
CGN1	28	35591906	35602846
CL46	28	35668986	35700161
CL43	28	35714667	35748478
SFTPD	28	35813760	35824383
MBL1	28	35840849	35854765
MAT1A	28	35870568	35887533
DYDC1	28	35923906	35945148
DYDC2	28	35953579	35958219
PICALM	29	9613012	9665840
CCDC83	29	9706418	9758502
DDB1	29	40509559	40537404
DAK	29	40537653	40549701
SDHAF2	29	40616949	40626477
SYT7	29	40682320	40716882
ZBTB3	29	41754017	41755558
TAF6L	29	41785795	41793146
NXF1	29	41796853	41808165
STX5	29	41809627	41837545
WDR74	29	41838794	41846745
SLC3A2	29	41855871	41896760
CHRM1	29	41919874	41921707
LOC519202	29	41944850	41971535
SLC22A6	29	41982590	41990431
SLC22A8	29	42000106	42020001
LOC532368	29	42063213	42078994
SLC22A24	29	42120556	42155545
LOC520237	29	42247003	42271225
RASGRP2	29	43590193	43602499
PYGM	29	43606012	43617848
SF1	29	43623210	43636775
MAP4K2	29	43648614	43661350
MIR194-2	29	43731460	43731542
ATG2A	29	43752917	43757930
PPP2R5B	29	43765388	43774236
GPHA2	29	43774445	43775105
C29H11orf85	29	43777687	43802953
BATF2	29	43825077	43830937
ARL2	29	43845378	43853177
SNX15	29	43905796	43917298
SAC3D1	29	43917755	43919976
NAALADL1	29	43919968	43936194
CDCA5	29	43943684	43960477
TM7SF2	29	43981731	43986407
ZNHIT2	29	43986566	43987804
MRPL49	29	43992489	43996386
SYVN1	29	43997381	44003325
CAPN1	29	44064429	44089990
FOSL1	29	44673879	44679325
C29H11orf68	29	44691682	44693901
DRAP1	29	44694171	44696295
TSGA10IP	29	44716272	44725594
SART1	29	44726692	44741763
EIF1AD	29	44756084	44759164
CST6	29	44766936	44768173
CATSPER1	29	44772899	44779138
GAL3ST3	29	44790176	44800852
SF3B2	29	44803791	44817398
PACS1	29	44920590	44948773
KLC2	29	44960930	44970707
RAB1B	29	44972615	44977021
YIF1A	29	44984659	44988709
TMEM151A	29	44993275	44994609
CD248	29	45016284	45018614
RIN1	29	45029460	45034780
BRMS1	29	45035736	45042778
B3GNT1	29	45043096	45045344
SLC29A2	29	45056314	45063665
