# Supplementary material for: Meta-analysis for milk fat and protein percentage using imputed sequence variant genotypes in 94,321 cattle from eight cattle breeds
Source: Genet Sel Evol. 2020 Jul 7;52:37. doi: 10.1186/s12711-020-00556-4 (PMC7339598; doi:10.1186/s12711-020-00556-4)
Supplement: Supplementary file 8 — Additional file 8: Table S5. DAVID analysis for fat percentage. Three clusters with the highest enrichment scores according to DAVID functional annotation clustering for genes associated with significant variants in the meta-analysis for fat percentage. [file 12711_2020_556_MOESM8_ESM.xlsx]

## Sheet: DAVID clusters
Column1	Column2	Column3	Column4	Column5	Column6	Column7	Column8	Column9	Column10	Column11	Column12	Column13
Annotation Cluster 1	Enrichment Score: 1.9788442399489374
Category	Term	Count	%	PValue	Genes	List Total	Pop Hits	Pop Total	Fold Enrichment	Bonferroni	Benjamini	FDR
UP_KEYWORDS	Allergen	3	0.7672634271099744	0.006174925038025822	LALBA, CSN1S1, PAEP	373	6	17808	23.871313672922252	0.7710355114004432	0.15108711472514025	7.673954416597494
UP_KEYWORDS	Milk protein	3	0.7672634271099744	0.008525962092556471	LALBA, CSN1S1, PAEP	373	7	17808	20.46112600536193	0.8696951813706526	0.156186039424013	10.450092111710262
UP_TISSUE	Mammary gland	6	1.5345268542199488	0.021983264890033077	FABP3, LALBA, CSN1S1, PAEP, PABPC1, CHI3L1	220	76	10382	3.725598086124402	0.6322244292033155	0.6322244292033155	18.864074144177177
Annotation Cluster 2	Enrichment Score: 1.7494410351398695
Category	Term	Count	%	PValue	Genes	List Total	Pop Hits	Pop Total	Fold Enrichment	Bonferroni	Benjamini	FDR
UP_KEYWORDS	Lipid biosynthesis	10	2.557544757033248	8.396736814224767E-5	MECR, FDPS, PMVK, ST8SIA1, PTDSS1, HSD17B12, PCYT2, FASN, SCD, GPAT4	373	87	17808	5.48765831561431	0.019786694841409713	0.019786694841409713	0.10818311330058616
GOTERM_BP_DIRECT	GO:0006633~fatty acid biosynthetic process	5	1.278772378516624	0.004010617812813212	MECR, HSD17B12, ACACB, FASN, SCD	295	31	13824	7.558228540185894	0.9882589284033146	0.891643774536553	6.2284915612860425
KEGG_PATHWAY	bta01212:Fatty acid metabolism	4	1.0230179028132993	0.07286399597813464	MECR, HSD17B12, FASN, SCD	154	48	7550	4.0854978354978355	0.9999998017272135	0.8897277696583255	61.377356924876466
UP_KEYWORDS	Fatty acid biosynthesis	3	0.7672634271099744	0.19568949645953093	MECR, FASN, SCD	373	39	17808	3.6725097958341926	1.0	0.8121122815957111	93.96223696427035
UP_KEYWORDS	Fatty acid metabolism	3	0.7672634271099744	0.3727284165227006	MECR, FASN, SCD	373	62	17808	2.3101271296376376	1.0	0.9057351668293013	99.75502268194643
Annotation Cluster 3	Enrichment Score: 1.4854152936784006
Category	Term	Count	%	PValue	Genes	List Total	Pop Hits	Pop Total	Fold Enrichment	Bonferroni	Benjamini	FDR
UP_KEYWORDS	Membrane attack complex	3	0.7672634271099744	0.0012875789046311891	C6, C7, C9	373	3	17808	47.742627345844504	0.2640854253827287	0.0737955760747242	1.647092211632617
UP_SEQ_FEATURE	domain:LDL-receptor class A	3	0.7672634271099744	0.0013826320436487992	C6, C7, C9	137	3	6267	45.74452554744526	0.43994690709157513	0.251633049294382	1.924114887313244
UP_KEYWORDS	Cytolysis	3	0.7672634271099744	0.002539545275712016	C6, C7, C9	373	4	17808	35.806970509383376	0.4540241543632303	0.0959435029710709	3.224598550891744
GOTERM_CC_DIRECT	GO:0005579~membrane attack complex	3	0.7672634271099744	0.00422412813669135	C6, C7, C9	326	5	15461	28.455828220858898	0.6470173744239949	0.6470173744239949	5.337489064610423
UP_SEQ_FEATURE	domain:MACPF	3	0.7672634271099744	0.00447860521889111	C6, C7, C9	137	5	6267	27.446715328467153	0.8475243406514896	0.46576356125741736	6.108548954189452
GOTERM_BP_DIRECT	GO:0019835~cytolysis	4	1.0230179028132993	0.007167583882457393	TSTA3, C6, C7, C9	295	19	13824	9.865477252453166	0.9996494103921351	0.9294874620917531	10.873421190097442
UP_SEQ_FEATURE	domain:EGF-like	4	1.0230179028132993	0.00750941954488706	BCAN, C6, C7, C9	137	19	6267	9.630426431041107	0.9575029349504616	0.5459645797324408	10.043764518933319
UP_KEYWORDS	Complement pathway	3	0.7672634271099744	0.03819146397259307	C6, C7, C9	373	15	17808	9.5485254691689	0.9999055736393279	0.4396707056580371	39.465079605471665
GOTERM_BP_DIRECT	GO:0006958~complement activation, classical pathway	3	0.7672634271099744	0.044453889898448735	C6, C7, C9	295	16	13824	8.786440677966102	1.0	0.9934561646122272	51.69676793503939
UP_KEYWORDS	Sushi	3	0.7672634271099744	0.09532134749870531	BCAN, C6, C7	373	25	17808	5.729115281501341	0.9999999999557765	0.645340969721016	72.50868343711309
KEGG_PATHWAY	bta05020:Prion diseases	3	0.7672634271099744	0.13659384522290516	C6, C7, C9	154	32	7550	4.596185064935065	0.9999999999999027	0.950020850671806	84.22639667081137
KEGG_PATHWAY	bta04610:Complement and coagulation cascades	4	1.0230179028132993	0.1890989704806614	VWF, C6, C7, C9	154	74	7550	2.65005265005265	1.0	0.9528445867931795	92.83349896208047
UP_KEYWORDS	EGF-like domain	5	1.278772378516624	0.31664821301051993	BCAN, C6, C7, C9, EGFLAM	373	136	17808	1.7552436524207538	1.0	0.8962151910993502	99.26124127746722
UP_KEYWORDS	Innate immunity	3	0.7672634271099744	0.6102881944736298	C6, C7, C9	373	98	17808	1.4615090003829951	1.0	0.9665653730895805	99.99946969104346
UP_KEYWORDS	Immunity	4	1.0230179028132993	0.6529881505184862	LAX1, C6, C7, C9	373	160	17808	1.1935656836461126	1.0	0.9726365635883142	99.99988118715855
KEGG_PATHWAY	bta05322:Systemic lupus erythematosus	4	1.0230179028132993	0.7047839366695553	GRIN2B, C6, C7, C9	154	178	7550	1.1017072814825626	1.0	0.9924044375520061	99.99997826186102

## Sheet: gene positions
gene	chr	start	end
FABP3	2	122723225	122783830
BCAN	3	14223569	14241533
FDPS	3	15356047	15374937
PMVK	3	15715719	15725510
LALBA	5	31347861	31349882
ST8SIA1	5	88287352	88453869
GRIN2B	5	96408804	96761516
VWF	5	104603432	104727301
CSN1S1	6	87141556	87159096
PAEP	11	103301664	103306381
MECR	12	124913878	124949961
TSTA3	14	2288555	2293395
PABPC1	14	65816006	65833756
PTDSS1	14	70236070	70303427
HSD17B12	15	74652043	74830690
CHI3L1	16	771323	781451
LAX1	16	1327008	1335059
ACACB	17	66102654	66198865
FASN	19	51384922	51403614
PCYT2	19	51592128	51599282
C6	20	33328558	33405555
C7	20	33549495	33606517
C9	20	35092195	35158959
EGFLAM	20	35999051	36178472
SCD	26	21141592	21148318
GPAT4	27	36212255	36229009
