# Supplementary material for: Meta-analysis for milk fat and protein percentage using imputed sequence variant genotypes in 94,321 cattle from eight cattle breeds
Source: Genet Sel Evol. 2020 Jul 7;52:37. doi: 10.1186/s12711-020-00556-4 (PMC7339598; doi:10.1186/s12711-020-00556-4)
Supplement: Supplementary file 9 — Additional file 9: Table S6. DAVID analysis for protein percentage. Three clusters with the highest enrichment scores according to DAVID functional annotation clustering for genes associated with significant variants in the meta-analysis for protein percentage. [file 12711_2020_556_MOESM9_ESM.xlsx]

## Sheet: DAVID clusters
Column1	Column2	Column3	Column4	Column5	Column6	Column7	Column8	Column9	Column10	Column11	Column12	Column13
Annotation Cluster 1	Enrichment Score: 5.180475105404053
Category	Term	Count	%	PValue	Genes	List Total	Pop Hits	Pop Total	Fold Enrichment	Bonferroni	Benjamini	FDR
GOTERM_MF_DIRECT	GO:0005452~inorganic anion exchanger activity	9	1.1826544021024967	9.903864787801315E-7	ENSBTAG00000017950, SLC4A4, SLC22A6, SLC22A8, SLC22A10, SLC22A24, SLC22A20, LOC519202, LOC520237	540	21	13095	10.392857142857142	5.712900329346571E-4	2.8568582466259596E-4	0.0014548901451694185
GOTERM_MF_DIRECT	GO:0015347~sodium-independent organic anion transmembrane transporter activity	8	1.0512483574244416	1.352640729075309E-5	ENSBTAG00000017950, SLC22A6, SLC22A8, SLC22A10, SLC22A24, SLC22A20, LOC519202, LOC520237	540	21	13095	9.238095238095239	0.007774411503868817	0.002598215377828228	0.019868756771257434
GOTERM_BP_DIRECT	GO:0043252~sodium-independent organic anion transport	8	1.0512483574244416	2.145791502053827E-5	ENSBTAG00000017950, SLC22A6, SLC22A8, SLC22A10, SLC22A24, SLC22A20, LOC519202, LOC520237	580	22	13824	8.667084639498434	0.03937354293163464	0.009992155328801267	0.03660177944706522
Annotation Cluster 2	Enrichment Score: 3.7653916183371656
Category	Term	Count	%	PValue	Genes	List Total	Pop Hits	Pop Total	Fold Enrichment	Bonferroni	Benjamini	FDR
GOTERM_MF_DIRECT	GO:0015020~glucuronosyltransferase activity	10	1.314060446780552	1.1072608695979448E-8	UGT2A3, UGT2B15, LOC512039, LOC100296421, LOC100140261, UGT2B4, LOC530553, UGT2B10, LOC100138004, B3GNT1	540	18	13095	13.47222222222222	6.3888748571550025E-6	6.3888748571550025E-6	1.6265909963397718E-5
GOTERM_BP_DIRECT	GO:0009813~flavonoid biosynthetic process	8	1.0512483574244416	1.438325805624006E-7	UGT2B15, LOC512039, LOC100296421, LOC100140261, UGT2B4, LOC530553, UGT2B10, LOC100138004	580	12	13824	15.889655172413793	2.6921836431392787E-4	2.6921836431392787E-4	2.453840226235293E-4
GOTERM_BP_DIRECT	GO:0052696~flavonoid glucuronidation	8	1.0512483574244416	1.438325805624006E-7	UGT2B15, LOC512039, LOC100296421, LOC100140261, UGT2B4, LOC530553, UGT2B10, LOC100138004	580	12	13824	15.889655172413793	2.6921836431392787E-4	2.6921836431392787E-4	2.453840226235293E-4
KEGG_PATHWAY	bta00040:Pentose and glucuronate interconversions	8	1.0512483574244416	4.788422243541336E-5	UGT2A3, LOC100296421, LOC100140261, UGT2B4, LOC530553, UGT2B10, LOC100138004, UGP2	299	26	7550	7.769488037046566	0.011805335200332778	0.011805335200332778	0.0621097711495322
KEGG_PATHWAY	bta00053:Ascorbate and aldarate metabolism	7	0.9198423127463863	1.1807902257479908E-4	UGT2A3, LOC100296421, LOC100140261, UGT2B4, LOC530553, UGT2B10, LOC100138004	299	21	7550	8.416945373467112	0.02886066697527423	0.01453598085738017	0.1530938468665699
KEGG_PATHWAY	bta00830:Retinol metabolism	9	1.1826544021024967	0.001460449792711492	UGT2A3, LOC100296421, LOC100140261, ADH4, UGT2B4, LOC530553, UGT2B10, LOC100138004, DGAT1	299	56	7550	4.058170090778787	0.30403526474514	0.11380544332451703	1.8783858235893236
KEGG_PATHWAY	bta00140:Steroid hormone biosynthesis	9	1.1826544021024967	0.0016419254322102086	UGT2A3, SULT1E1, LOC100296421, LOC100140261, UGT2B4, LOC530553, UGT2B10, LOC100138004, CYP11B1	299	57	7550	3.986974124273895	0.3347099496869447	0.0968648255191672	2.109505665275757
KEGG_PATHWAY	bta00982:Drug metabolism - cytochrome P450	9	1.1826544021024967	0.001840800741899689	MGST1, UGT2A3, LOC100296421, LOC100140261, ADH4, UGT2B4, LOC530553, UGT2B10, LOC100138004	299	58	7550	3.9182331910967596	0.3667812122009877	0.08733633987394429	2.3622079372727756
KEGG_PATHWAY	bta00980:Metabolism of xenobiotics by cytochrome P450	9	1.1826544021024967	0.002058218010147307	MGST1, UGT2A3, LOC100296421, LOC100140261, ADH4, UGT2B4, LOC530553, UGT2B10, LOC100138004	299	59	7550	3.851822459044272	0.40008307088411876	0.08163529103442113	2.637781702129638
UP_KEYWORDS	Glycosyltransferase	16	2.102496714848883	0.002330031240259936	UGT2B15, UGT2A3, LOC512039, LOC100296421, LOC100140261, LOC530553, UGT2B10, LOC100138004, ABO, PARP10, NAPRT1, ART1, PIGC, PARP8, PYGM, B3GNT1	732	159	17808	2.448087431693989	0.5113722105075038	0.06303085931789465	3.0797985513602133
KEGG_PATHWAY	bta00983:Drug metabolism - other enzymes	7	0.9198423127463863	0.002574157463009524	UGT2A3, LOC100296421, LOC100140261, UGT2B4, LOC530553, UGT2B10, LOC100138004	299	36	7550	4.909884801189149	0.47229302617766333	0.08727103395457236	3.2888583495164325
KEGG_PATHWAY	bta00860:Porphyrin and chlorophyll metabolism	7	0.9198423127463863	0.002574157463009524	UGT2A3, LOC100296421, LOC100140261, UGT2B4, LOC530553, UGT2B10, LOC100138004	299	36	7550	4.909884801189149	0.47229302617766333	0.08727103395457236	3.2888583495164325
KEGG_PATHWAY	bta05204:Chemical carcinogenesis	9	1.1826544021024967	0.006030547123388621	MGST1, UGT2A3, LOC100296421, LOC100140261, ADH4, UGT2B4, LOC530553, UGT2B10, LOC100138004	299	70	7550	3.246536072623029	0.7768929256987576	0.15352800667214406	7.547987353870789
GOTERM_CC_DIRECT	GO:0043231~intracellular membrane-bounded organelle	12	1.5768725361366622	0.017573601041896193	UGT2B15, LOC512039, LOC100296421, LOC100140261, UGT2B4, LOC530553, UGT2B10, LOC100138004, SEC16B, EXOC2, LOC618042, SNX15	643	128	15461	2.2542282270606533	0.9992782118037125	0.7004966880353991	21.964752059412728
Annotation Cluster 3	Enrichment Score: 3.4594877327214824
Category	Term	Count	%	PValue	Genes	List Total	Pop Hits	Pop Total	Fold Enrichment	Bonferroni	Benjamini	FDR
GOTERM_BP_DIRECT	GO:0032355~response to estradiol	7	0.9198423127463863	2.030588005929642E-6	LALBA, CSN2, CSN1S2, CSN1S1, LOC538751, CSN3, STAT3	580	11	13824	15.167398119122257	0.0037940489460353	0.0018988272454717459	0.003464210279269242
GOTERM_BP_DIRECT	GO:1903496~response to 11-deoxycorticosterone	5	0.657030223390276	1.4727421936003814E-5	LALBA, CSN2, CSN1S2, CSN1S1, CSN3	580	5	13824	23.83448275862069	0.02719335488893404	0.009147880164969147	0.02512261712735997
GOTERM_BP_DIRECT	GO:1903494~response to dehydroepiandrosterone	5	0.657030223390276	1.4727421936003814E-5	LALBA, CSN2, CSN1S2, CSN1S1, CSN3	580	5	13824	23.83448275862069	0.02719335488893404	0.009147880164969147	0.02512261712735997
UP_KEYWORDS	Milk protein	5	0.657030223390276	8.925677930970786E-5	LALBA, CSN2, CSN1S2, CSN1S1, CSN3	732	7	17808	17.377049180327866	0.027030996780125882	0.009092759952330831	0.11962720354470324
GOTERM_BP_DIRECT	GO:0032570~response to progesterone	5	0.657030223390276	7.941427242339951E-4	LALBA, CSN2, CSN1S2, CSN1S1, CSN3	580	11	13824	10.83385579937304	0.7740012459390693	0.2572866864180292	1.3462345516424112
GOTERM_CC_DIRECT	GO:0005796~Golgi lumen	4	0.5256241787122208	0.00341220669171866	CSN2, CSN1S2, CSN1S1, CSN3	643	8	15461	12.022550544323485	0.7520581288287786	0.5020623822493209	4.668740511001812
UP_TISSUE	Mammary gland	10	1.314060446780552	0.005239796079642381	MUC1, LALBA, CSN2, CSN1S1, CSN3, PABPC1, CHI3L1, STAT5A, STAT5B, STAT3	449	76	10382	3.0424334779041144	0.2892838654083255	0.2892838654083255	5.213602529951055
GOTERM_MF_DIRECT	GO:0005215~transporter activity	6	0.7884362680683311	0.37786213455362	CRABP2, SLC15A5, CSN2, CSN1S2, CSN1S1, STARD10	540	98	13095	1.4846938775510206	1.0	0.9980179971297081	99.90621177508405

## Sheet: gene positions
gene	chr	start	end
CRABP2	3	14173130	14178630
MUC1	3	15482856	15486936
ENSBTAG00000017950	5	28470126	28528971
LALBA	5	31347861	31349882
MGST1	5	93926791	93950162
SLC15A5	5	94030765	94127585
ADH4	6	26853175	26885435
LOC100138004	6	85926576	85948595
UGT2B4	6	85963549	85989621
LOC100140261	6	86034662	86055504
UGT2B10	6	86169557	86190786
LOC100296421	6	86223188	86239206
UGT2B15	6	86334723	86353208
LOC530553	6	86400287	86439022
LOC512039	6	86676447	86713666
UGT2A3	6	86810496	86835733
SULT1E1	6	87035926	87094952
CSN1S1	6	87141556	87159096
CSN2	6	87179502	87188025
CSN1S2	6	87262457	87280936
CSN3	6	87378398	87392750
SLC4A4	6	88182303	88541046
LOC538751	6	91126256	91138391
UGP2	11	62244354	62299938
ABO	11	104232297	104251043
DGAT1	14	1795351	1804562
PARP10	14	2024713	2031386
NAPRT1	14	2327870	2331019
CYP11B1	14	2705112	2710148
PABPC1	14	65816006	65833756
ART1	15	52184590	52213125
STARD10	15	53087563	53115417
CHI3L1	16	771323	781451
PIGC	16	40785953	40788409
SEC16B	16	60747108	60792164
STAT5B	19	42960226	42996671
STAT5A	19	43033597	43054075
STAT3	19	43056660	43132624
PARP8	20	28315521	28506629
EXOC2	23	51917537	52015377
LOC618042	25	36174074	36176834
LOC519202	29	41944850	41971535
SLC22A6	29	41982590	41990431
SLC22A8	29	42000106	42020001
SLC22A24	29	42120556	42155545
LOC520237	29	42247003	42271225
SLC22A10	29	42287600	42313683
PYGM	29	43606012	43617848
SNX15	29	43905796	43917298
SLC22A20	29	44092127	44114038
B3GNT1	29	45043096	45045344
